# Supplementary material for: αE-Catenin Is a Positive Regulator of Pancreatic Islet Cell Lineage Differentiation
Source: PubMed Central journal article supplement — Cell Rep. Author manuscript; Available in PMC 2017 Sep 25. (PMC5611824; doi:10.1016/j.celrep.2017.07.035), 2017-08-08
Supplement: NIHMS896921-supplement-s1.pdf [file NIHMS896921-supplement-s1.pdf]

**Supplemental Information**

**$\alpha$ E-catenin is a positive regulator of pancreatic islet cell lineage differentiation**

Antonio J. Jimenez-Caliani, Rudolf Pillich, Wendy Yang, Giuseppe R. Diaferia, Paolo Meda, Laura Crisa and Vincenzo Cirulli.

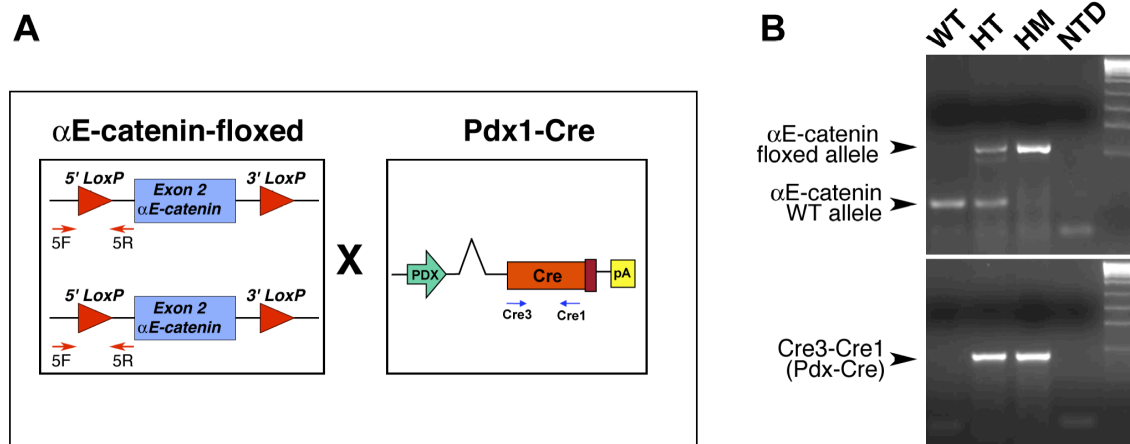

**Figure S1. Breeding strategy and genotype of Pdx1-Cre; $\alpha$ E-catenin-KO mice (Related to Figure 1).**

(A)  $\alpha$ E-catenin<sup>flox/flox</sup> mice (Vasioukhin et al., 2001) were bred to Pdx1-Cre mice (Gu et al., 2002) to yield heterozygous (HT) Pdx1-Cre; $\alpha$ E-catenin<sup>flox/-</sup> mice (B). Backcrossing of these HT mice to (A)  $\alpha$ E-catenin<sup>flox/flox</sup> animals yielded homozygous Pdx1-Cre; $\alpha$ E-catenin<sup>-/-</sup> mutants (B).

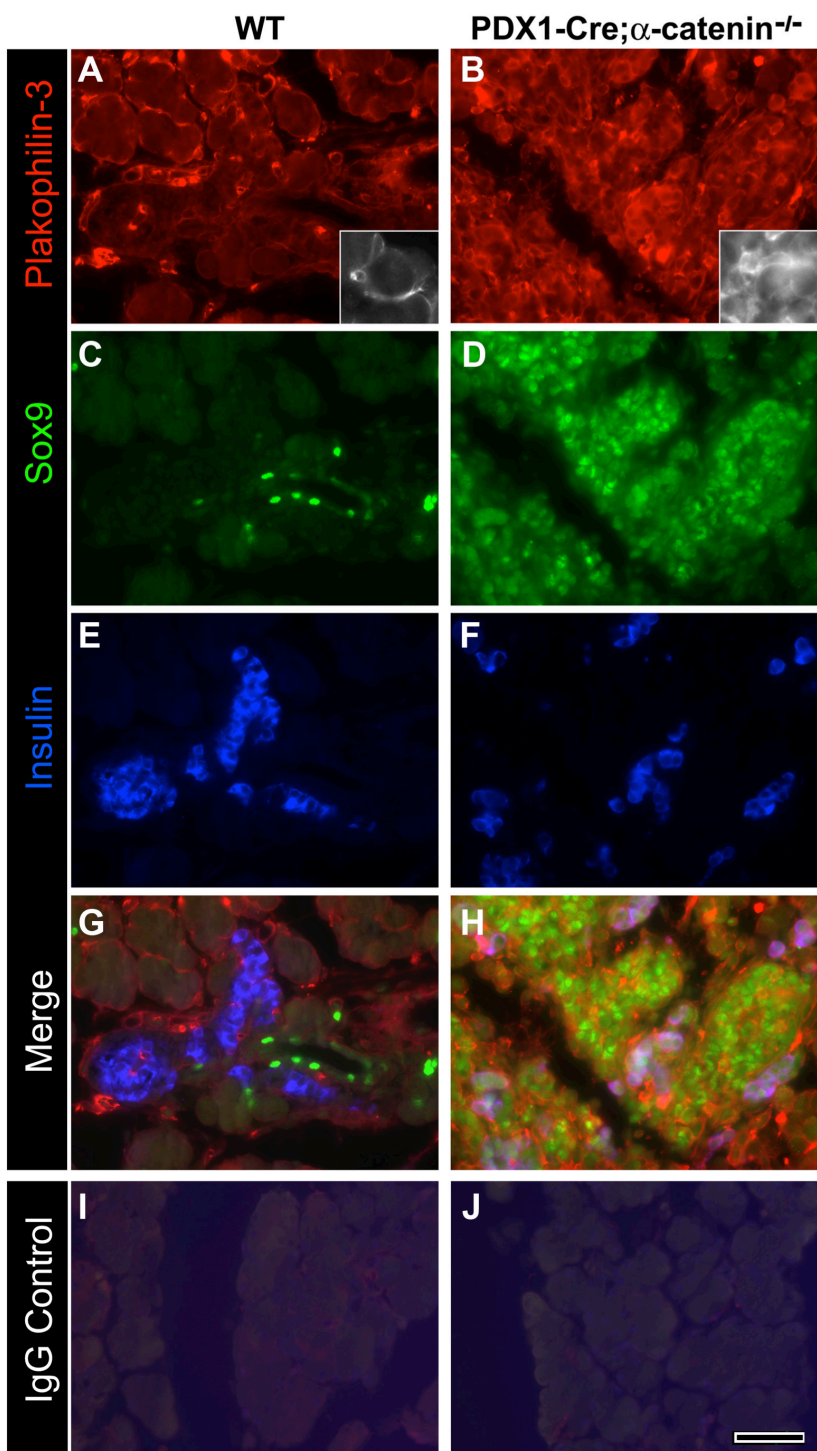

**Figure S2. Expression pattern of Plakophilin-3 in Pdx1-Cre; $\alpha$ E-catenin-KO pancreata (Related to Figures 2 & 3).** In the pancreas of WT mice (left panels) Plakophilin-3-specific immunoreactivity is primarily detected at the cell surface of all epithelial cells (A, G), albeit most prominently in ductal cells. This pattern is altered in Pdx1-Cre; $\alpha$ E-catenin-KO pancreata (right panels) where significant immunoreactivity is also detected in the cytoplasm (B, H). Insets in A and B provide monochromatic examples of immunoreactivity for Plakophilin-3. Note the accumulation of Sox9<sup>+</sup> cells in mutant pancreata (D), compared to WT (C), and the rare insulin<sup>+</sup> cells (F vs E). (G, H) three-color merging of individual immunoreactivities. (I and J) Negative control staining performed using irrelevant species-matched control IgGs as primary antibodies. Reference bar= 50  $\mu$ m.

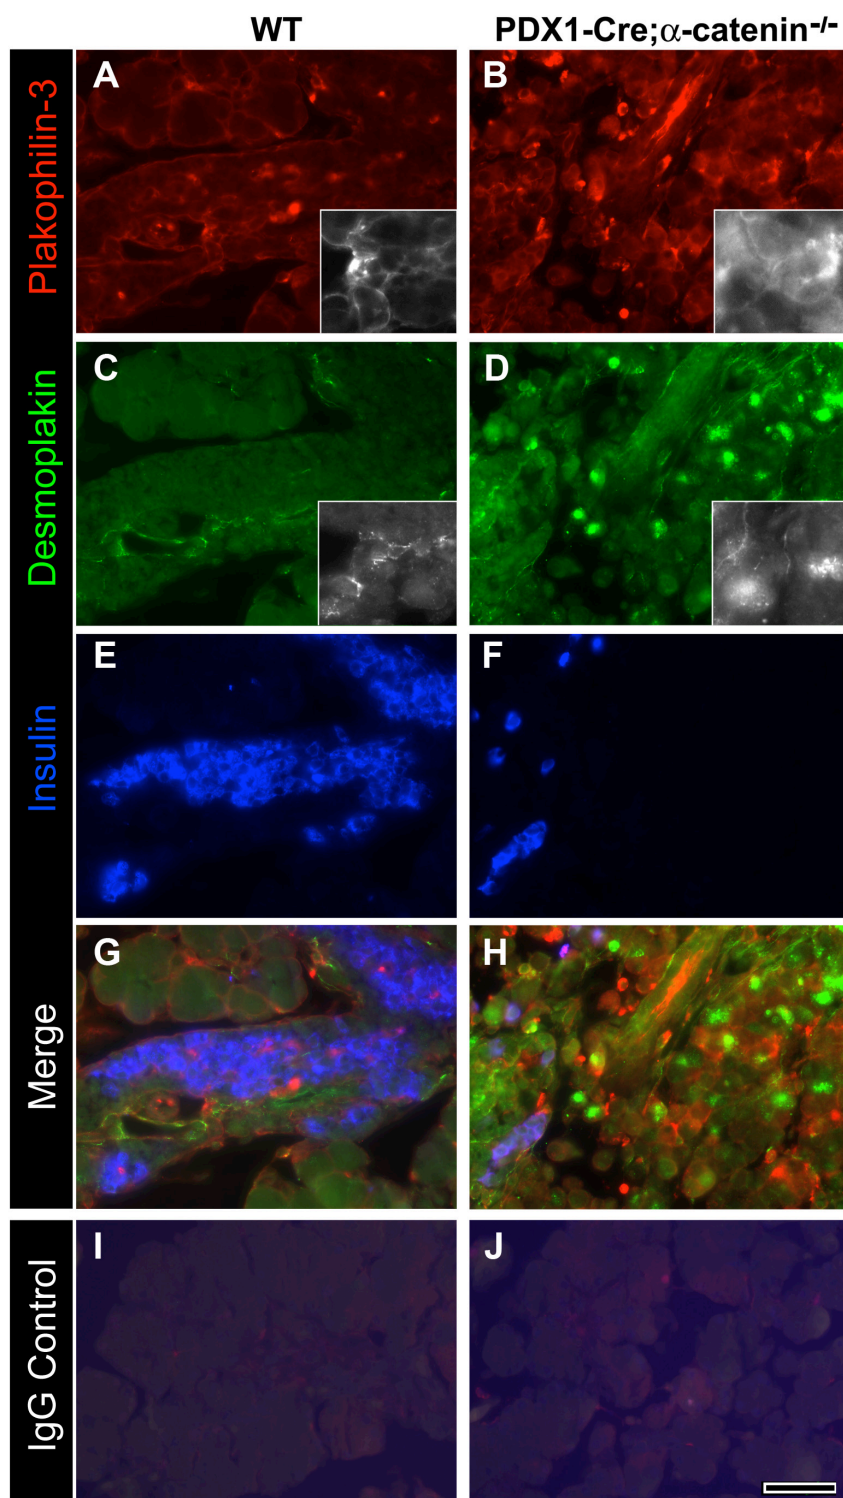

**Figure S3. Expression pattern of Desmoplakin in Pdx1-Cre; $\alpha$ E-catenin-KO pancreata (Related to Figures 2 & 3).** In the pancreas of WT mice (left panels), Desmoplakin-specific immunoreactivity is primarily detected at the cell surface of ductal and exocrine cells (C, and G). This pattern is altered in Pdx1-Cre; $\alpha$ E-catenin-KO pancreata (right panels) where significant immunoreactivity is also detected in the cytoplasm (D and H). Black and white insets show monochromatic examples of immunoreactivity for Plakophilin-3 (A and B), and for Desmoplakin (C and D). (I and J) Negative control staining performed using irrelevant species-matched control IgGs as primary antibodies. Reference bar= 50  $\mu$ m.

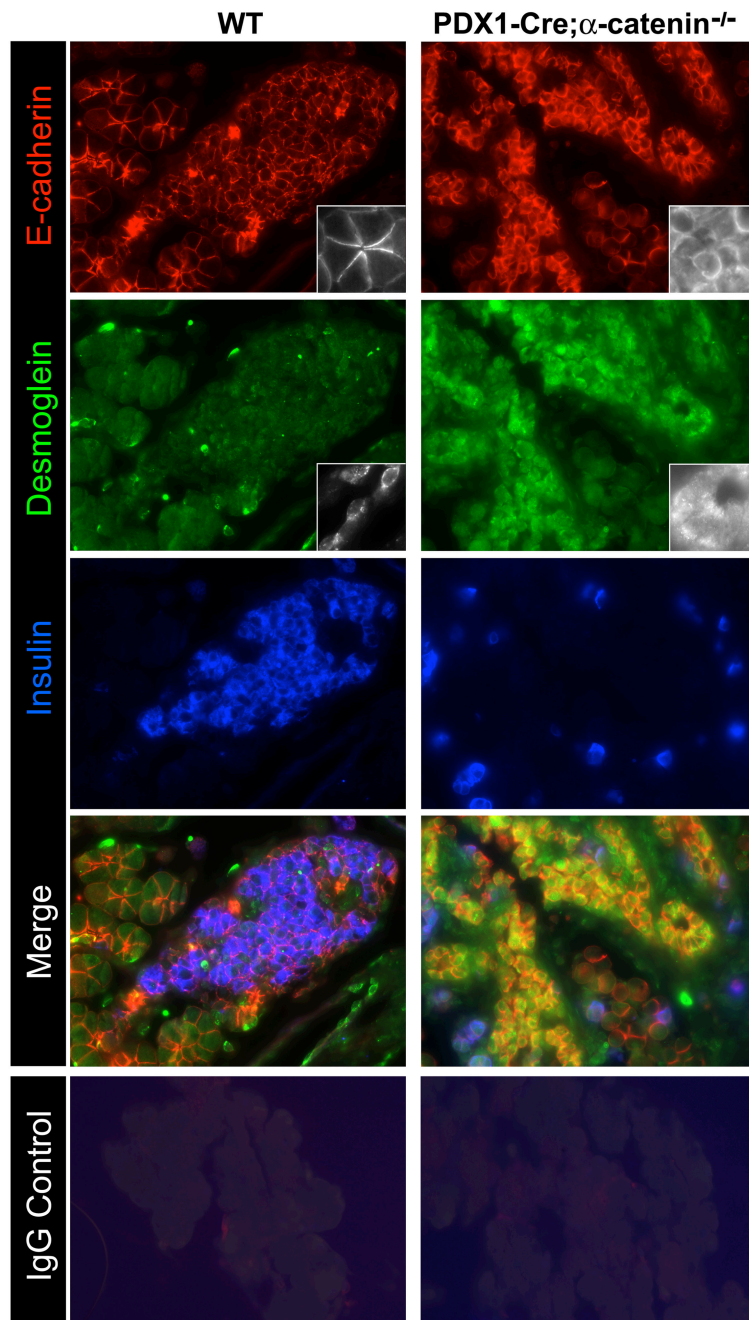

**Figure S4. Expression pattern of Desmoglein in Pdx1-Cre; $\alpha$ E-catenin-KO pancreata (Related to Figures 2 & 3).**

In the pancreas of WT mice (left panels) Desmoglein-specific immunoreactivity (C) is detected at the cell surface of both epithelial and non-epithelial (E-cadherin-negative) cells. This pattern is altered in Pdx1-Cre; $\alpha$ E-catenin-KO pancreata (right panels) where significant immunoreactivity is detected in cords of epithelial E-cadherin<sup>+</sup> cells and within the cell cytoplasm (D, and H). Black and white insets show monochromatic examples of immunoreactivity for E-cadherin (A and B), and for Desmoglein (C and D). (I and J) Negative control staining performed using irrelevant species-matched control IgGs as primary antibodies. Reference bar= 50  $\mu$ m.

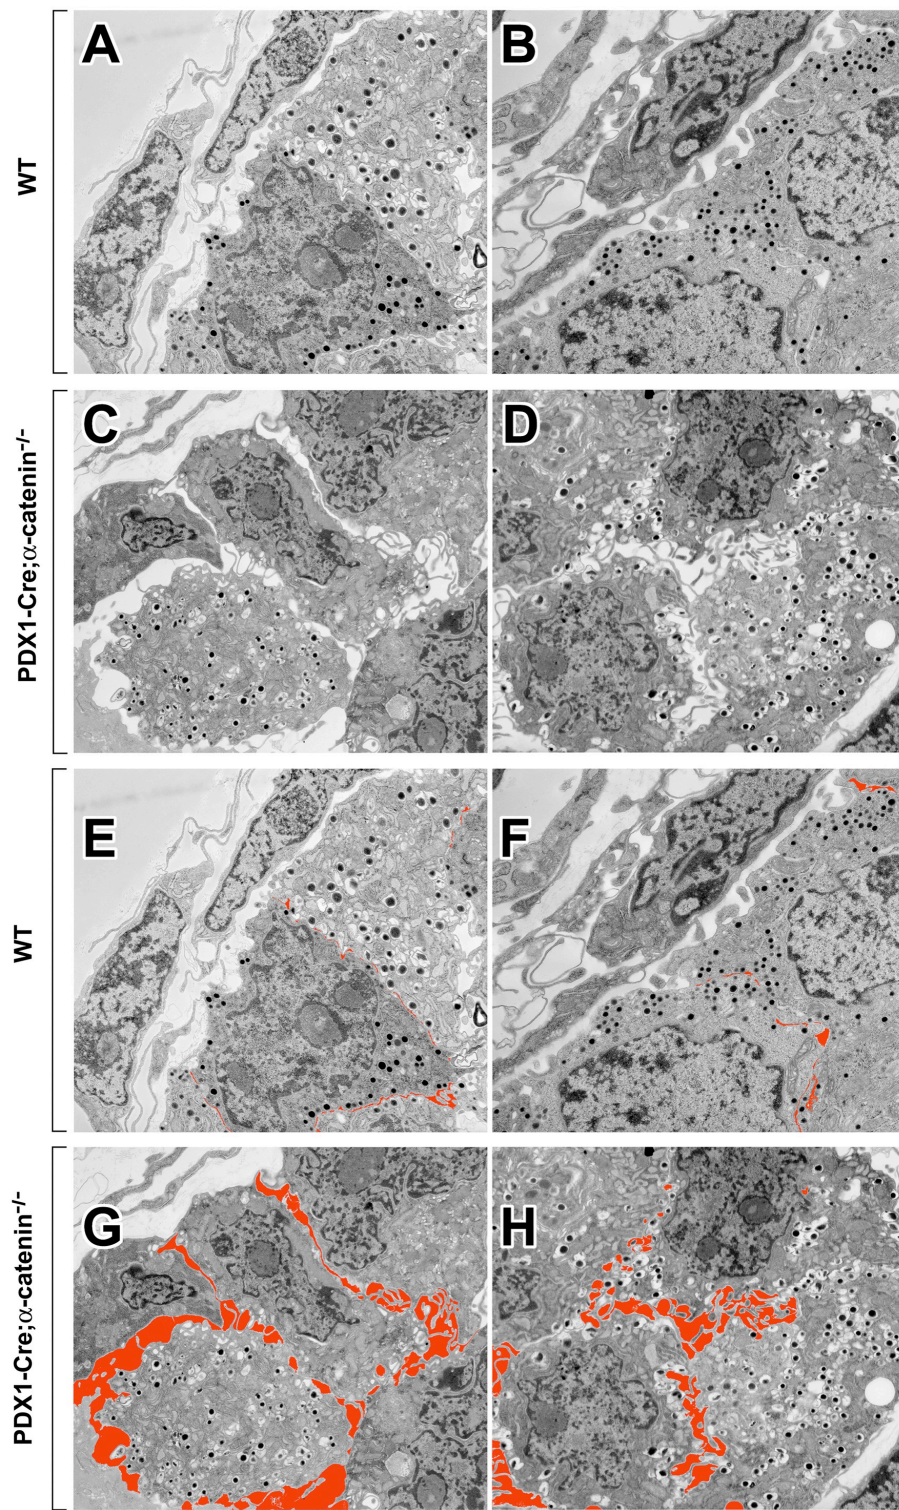

**Figure S5. Transmission Electron Microscopy of pancreatic endocrine cells from WT and Pdx1-Cre;αE-catenin-KO mice (Related to Figure 3).** Representative images of pancreatic endocrine cells from WT (A and B) and Pdx1-Cre;αE-catenin-KO mice (C and D). Digital tracing of inter-cellular spaces (E-H, red) highlights the significant loss of close cell-cell interactions in the tissue from Pdx1-Cre;αE-catenin-KO mice (G & H) as compared to wild type controls (E & F). Reference bar= 1  $\mu$ m.

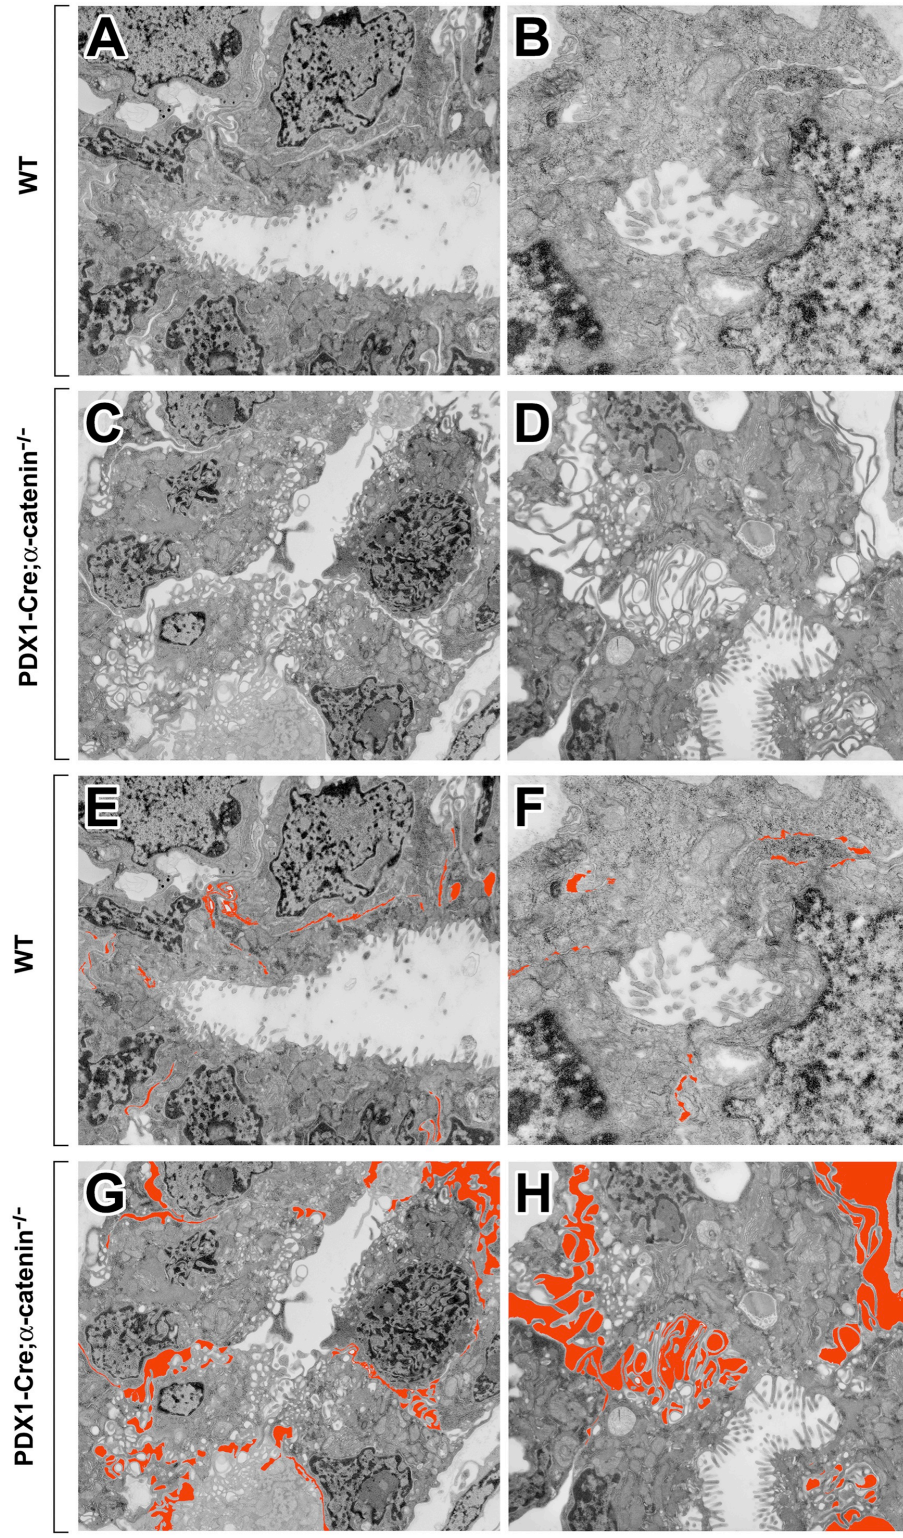

**Figure S6. Transmitted electron microscopy of pancreatic ductal cells from WT and Pdx1-Cre;αE-catenin-KO mice (Related to Figure 3).** Representative images of pancreatic ductal cells from WT (A & B) and Pdx1-Cre;αE-catenin-KO mice (C & D). Digital tracing of inter-cellular spaces (E-H, red) shows increased inter-cellular spaces between these pancreatic cell types in Pdx1-Cre; α E-catenin-KO mice (G & H) as compared to WT pancreata (E & F). Reference bar= 1 μm.

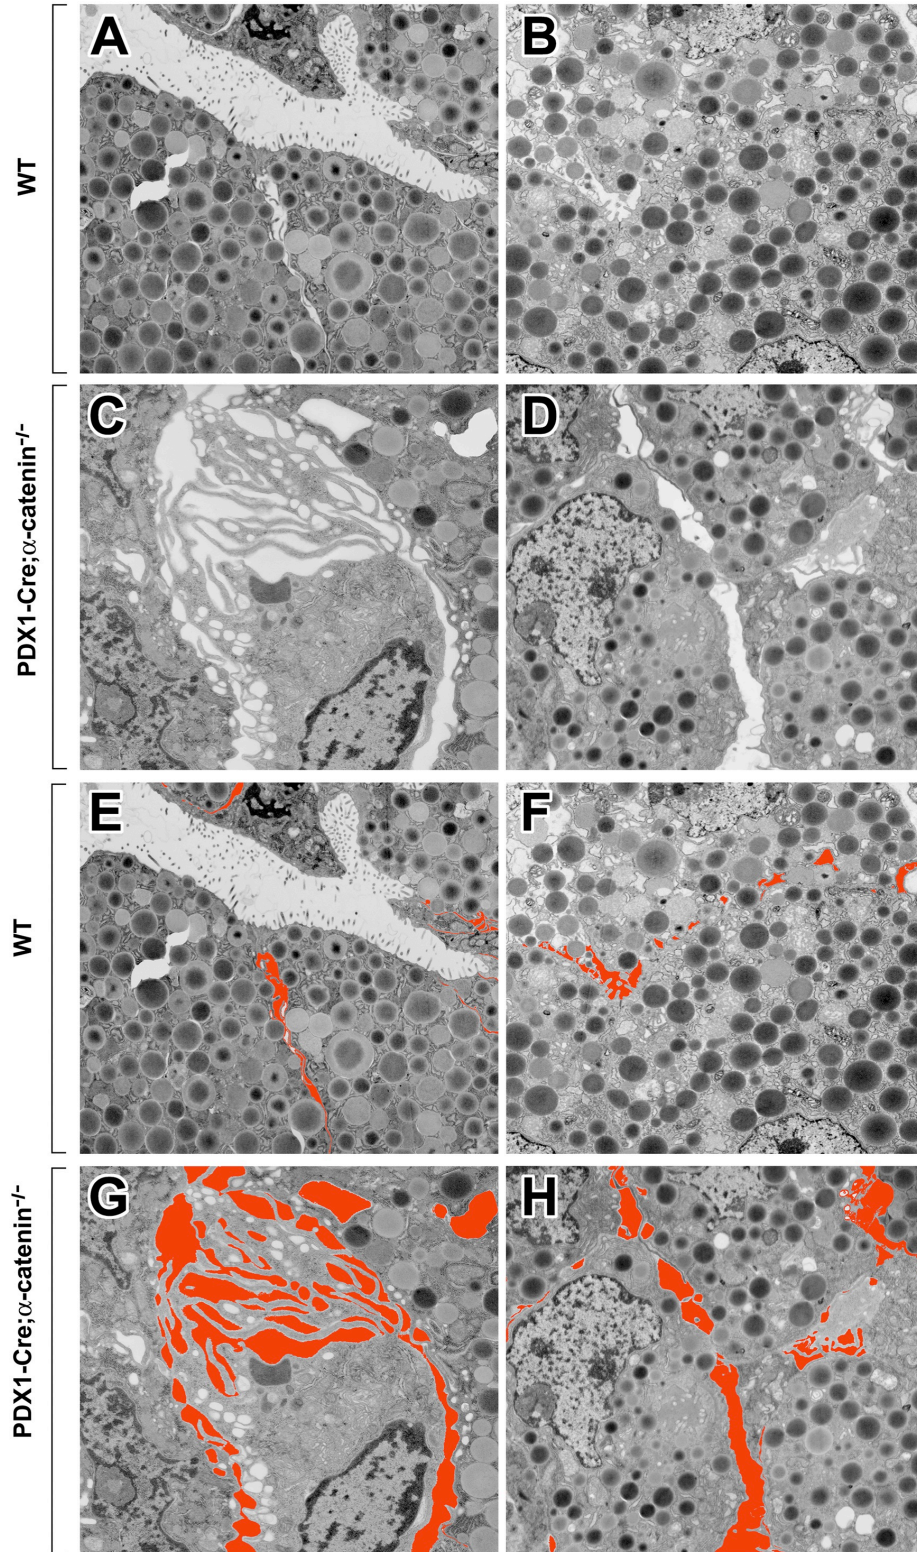

**Figure S7. Transmitted electron microscopy of pancreatic acinar cells from WT and Pdx1-Cre;αE-catenin-KO mice (Related to Figure 3).** Representative examples of pancreatic acinar cells from WT (A & B) and Pdx1-Cre; α E-catenin-KO mice (C & D). Inter-cellular spaces between acinar cells are significantly enlarged in the pancreas of Pdx1-Cre; α E-catenin-KO mice (G & H), compared to WT pancreata (E & F). Reference bar= 1  $\mu$ m.



**Table S1. Antibodies used for immunohistochemistry**

| Antigen                | Species    | Source                       | Dilution |
|------------------------|------------|------------------------------|----------|
| Sox9                   | Rabbit     | Chemicon                     | 1:800    |
| Insulin                | Guinea Pig | Dako                         | 1:400    |
| Glucose                | Mouse      | Sigma                        | 1:400    |
| Glucose                | Rabbit     | Dako                         | 1:400    |
| Somatostatin           | Rabbit     | Dako                         | 1:100    |
| Pancreatic polypeptide | Rabbit     | Dako                         | 1:100    |
| Ghrelin                | Goat       | Santa Cruz                   | 1:800    |
| Alpha-catenin          | Mouse      | BD Transduction Lab          | 1:200    |
| Beta-catenin           | Mouse      | BD Transduction Lab          | 1:200    |
| E-Cadherin             | Mouse      | BD Transduction Lab          | 1:200    |
| Amylase                | Rabbit     | Sigma                        | 1:400    |
| CPA-1                  | Rabbit     | Proteintech Group            | 1:400    |
| Mucin-1                | Rabbit     | Thermo Scientific            | 1:400    |
| Claudin 3              | Rabbit     | Invitrogen                   | 1:100    |
| Claudin 7              | Rabbit     | Invitrogen                   | 1:50     |
| Pan-Cytokeratin        | Mouse      | Sigma                        | 1:400    |
| Cytokeratin 19         | Mouse      | Sigma                        | 1:25     |
| PCNA                   | Mouse      | Dako                         | 1:100    |
| Histone 3              | Rabbit     | Upstate                      | 1:100    |
| Pax6                   | Rabbit     | Chemicon                     | 1:1000   |
| Nkx6.1                 | Mouse      | M. Sander, UCSD, CA, USA     | 1:500    |
| Nkx6.1                 | Mouse      | Beta Cell Biology Consortium | 1:1000   |
| PDX1                   | Goat       | M. Sander, UCSD, CA, USA     | 1:1000   |
| Ngn3                   | Guinea Pig | M. Sander, UCSD, CA, USA     | 1:800    |
| Ngn3                   | Mouse      | Beta Cell Biology Consortium | 1:2000   |
| Synaptophysin          | Rabbit     | Dako                         | 1:100    |
| HNF-3beta              | Goat       | R&D Systems                  | 1:100    |
| Desmoplakin            | Rabbit     | Abcam                        | 1:100    |
| Desmoglein             | Rabbit     | Abcam                        | 1:100    |
| Plakiphilin-3          | Mouse      | Santa Cruz                   | 1:100    |

**Table S2. Sequence of primers used for quantitative PCR.**

| Gene         | Forward                 | Reverse                 |
|--------------|-------------------------|-------------------------|
| Gli 1        | CCAAGCCAAC TTTATGTCAGGG | AGCCCGCTTCTTTGTTAATTGA  |
| Gli 2        | CAACGCCTACTCTCCCAGAC    | GAGCCTTGATGTACTGTACCAC  |
| Smo          | GAGCGTAGCTTCCGGGACTA    | CTGGGCCGATTCTTGATCTCA   |
| Ptch 1       | GATCCTCATGTGCCTTTT      | CACGTCCTGTAGCTCTAT      |
| Cyclin E     | CCAGCAGTAAGAAGCAGAG     | TCCACACCACTGTCTTTG      |
| Fgf 15       | TACTCGGAGGAAGACTGTA     | ATGAAGATGATATGGAGATGGT  |
| E-Cadherin   | ACTGGACTGTCTGTGTTAG     | AAAGGCACAGTTTATATCTCAG  |
| PDX1         | ACATCTCCCCATACGAAGTGCC  | CCAGGCTCGGTTCCATTCGG    |
| Nkx6.1       | AGTATCCTGGCTGCTCGC      | CCCGCCACAATTTCTAGGTTAA  |
| Neurogenin 3 | CCGGATGACGCCAAACTTA     | CATAGAAGCTGTGGTCCGCTATG |
